# Supplementary material
Source: PubMed Central journal article supplement (PMC4874643)
Supplement: NIHMS786953-supplement-Table_S1.pdf [file NIHMS786953-supplement-Table_S1.pdf]

**Supplementary Table S1.**

Mean regional metabolite concentrations <sup>1</sup> and tissue distributions with associated intra-subject COVs <sup>2</sup> by using multi-voxel analysis based on lobar level anatomic regions, and line with threshold of 11 Hz.

| Region <sup>3,4</sup> | NAA   |      | tCho |      | tCr  |      | Glx  |       | ml   |       | CSF  |       | GM   |       | WM   |       | LW   |      |
|-----------------------|-------|------|------|------|------|------|------|-------|------|-------|------|-------|------|-------|------|-------|------|------|
|                       | Mean  | COV  | Mean | COV  | Mean | COV  | Mean | COV   | Mean | COV   | Mean | COV   | Mean | COV   | Mean | COV   | Mean | COV  |
| RFL                   | 10.34 | 3.84 | 2    | 4.39 | 8.17 | 4.42 | 8.94 | 2.92  | 4.76 | 15.03 | 0.15 | 5.73  | 0.39 | 1.34  | 0.45 | 1.68  | 7.17 | 2.7  |
| LFL                   | 10.17 | 1.9  | 1.93 | 4.43 | 8.06 | 4.03 | 8.66 | 2.67  | 4.59 | 11.53 | 0.16 | 1.63  | 0.39 | 1.87  | 0.44 | 1.6   | 7.02 | 4.33 |
| RTL                   | 8.35  | 4.74 | 1.68 | 2.93 | 6.79 | 4.05 | 7.64 | 5.08  | 4.87 | 3.06  | 0.1  | 8.17  | 0.43 | 0.99  | 0.46 | 1.61  | 7.02 | 2.39 |
| LTL                   | 8.63  | 3.19 | 1.7  | 3.13 | 7.03 | 1.77 | 7.61 | 8.6   | 4.65 | 5.62  | 0.11 | 5.62  | 0.41 | 2.9   | 0.48 | 3.5   | 6.56 | 4.09 |
| RPL                   | 10.19 | 1.94 | 1.52 | 4.27 | 7.33 | 3.87 | 8.06 | 4.32  | 4.4  | 6.54  | 0.14 | 2.5   | 0.39 | 0.7   | 0.46 | 0.97  | 5.83 | 6.01 |
| LPL                   | 10.38 | 4.34 | 1.54 | 4.56 | 7.54 | 4.09 | 8.47 | 4.01  | 4.65 | 4.04  | 0.16 | 2.31  | 0.4  | 1     | 0.43 | 1.05  | 6.04 | 7.15 |
| ROL                   | 10.34 | 2.05 | 1.21 | 4.19 | 7.27 | 1.5  | 7.56 | 3.39  | 4.7  | 2.91  | 0.09 | 3.09  | 0.4  | 1.09  | 0.5  | 0.54  | 5.86 | 2.15 |
| LOL                   | 10.42 | 4.21 | 1.23 | 3.45 | 7.57 | 3.78 | 7.9  | 3.54  | 4.68 | 6.3   | 0.09 | 4.93  | 0.41 | 1.1   | 0.49 | 1.06  | 5.8  | 4.59 |
| Cbl                   | 7.72  | 2.22 | 2.18 | 2.33 | 8.72 | 2.96 | 7.94 | 4.06  | 5.25 | 5.61  | 0.15 | 4.27  | 0.41 | 1.98  | 0.43 | 3.03  | 6.23 | 3.84 |
| Region <sup>5</sup>   | Mean  | COV  | Mean | COV  | Mean | COV  | Mean | COV   | Mean | COV   | Mean | COV   | Mean | COV   | Mean | COV   | Mean | COV  |
| RFL                   | 10.38 | 4.13 | 1.93 | 7.81 | 8.22 | 7.35 | 8.1  | 6.89  | 4.54 | 12.08 | 0.14 | 13.4  | 0.39 | 4.21  | 0.44 | 2.97  | 6.94 | 6.49 |
| LFL                   | 10.27 | 2.8  | 1.99 | 8.05 | 8.39 | 8.18 | 8.25 | 5.44  | 4.87 | 11.13 | 0.15 | 15.86 | 0.4  | 5.4   | 0.43 | 4.25  | 6.8  | 6.69 |
| RTL                   | 8.88  | 5.92 | 1.7  | 7.74 | 7.2  | 6.02 | 7.6  | 5.59  | 4.89 | 8.55  | 0.08 | 24.85 | 0.44 | 5.14  | 0.47 | 4.7   | 7.35 | 6.88 |
| LTL                   | 9.18  | 5.31 | 1.77 | 7.07 | 7.4  | 6.05 | 7.87 | 6.4   | 4.98 | 6.65  | 0.09 | 26.92 | 0.42 | 3.89  | 0.49 | 3.92  | 6.9  | 4.58 |
| RPL                   | 10.3  | 3.63 | 1.5  | 6.52 | 7.34 | 7.01 | 7.13 | 5.73  | 4.13 | 8.92  | 0.16 | 16.05 | 0.39 | 5.26  | 0.43 | 5.83  | 6.26 | 9.68 |
| LPL                   | 10.18 | 4.45 | 1.51 | 8.53 | 7.3  | 8.17 | 7.48 | 6.3   | 4.29 | 9.71  | 0.19 | 15.93 | 0.38 | 5.26  | 0.42 | 5.69  | 6.27 | 9.5  |
| ROL                   | 10.9  | 4.94 | 1.24 | 8.65 | 7.67 | 4.56 | 7.66 | 10.31 | 4.67 | 6.44  | 0.08 | 28.12 | 0.39 | 5.76  | 0.51 | 3.61  | 6.19 | 6.61 |
| LOL                   | 10.93 | 5.71 | 1.32 | 6.97 | 7.93 | 4.24 | 7.69 | 6.71  | 4.68 | 11.87 | 0.1  | 28.13 | 0.41 | 5.56  | 0.48 | 5.08  | 5.9  | 5.59 |
| Cbl                   | 8.34  | 7.6  | 2.18 | 6.74 | 9.45 | 9.17 | 7.99 | 4.8   | 5.09 | 9.56  | 0.11 | 28.18 | 0.39 | 10.17 | 0.5  | 10.28 | 6.79 | 7.54 |

1. Metabolite concentration determined with reference to the tissue water and reported in institutional units (i.u.). 2. COV expressed in %. CSF = cerebrospinal fluid, GM = gray matter, WM = white matter, LW = linewidth. 3. The first letter R = right; the second letter F = frontal, P = parietal, O = occipital, T = temporal; the third letter L = lobe; Cbl = cerebellum. 4. Averaged from 5 repeated scans. 5. Averaged among 20 volunteers
